# Supplementary material for: Access to and use of preventive intermittent treatment for Malaria during pregnancy: A qualitative study in the Chókwè district, Southern Mozambique
Source: PubMed Central journal article supplement (PMC6345468; doi:10.1371/journal.pone.0203740), 2019-01-24
Supplement: pone.0203740.s001.pdf [file pone.0203740.s001.pdf]

## **S1 Form Interview guide with Pregnant women**

### **(a) General perception of diseases affecting the population in the study area among pregnant women**

What are the most common diseases in pregnant women and children in your community?

- a) What are the most frequent illnesses in raining season?
- b) What are the most frequent diseases in cold season?
- c) What should a pregnant woman do to protect herself from getting diseases?

### **b) Perceptions of malaria and IPTp-SP among pregnant women**

What is your knowledge about malaria?

→ Explore the following aspects:

- Transmission and prevention methods
  - If there is no mosquitoes can you still get malaria?
- Main symptoms and treatment
  - How does a person perceive that they have malaria?
- Causes and consequences/effects
  - What is your perception about the risk of getting malaria during pregnancy?
  - Do you think pregnant women are more vulnerable than others to get malaria?, Why?
  - How pregnant women feel when she has malaria, what can happen to her and to the baby?

What are the malaria prevention methods you know?

Probe:

- What malaria prevention methods have you been using?
- Did you hear about any medicines that are used to prevent malaria during pregnancy?  
If YES → Which one? (name it), What color were the medicines?
- Where did you get that information?
- Have you ever received antimalarial tablets during your pregnancy?
- If yes, where and how many tablets?
- What are the advantages can this medication bring to the pregnant women?
- Did you notice any side effect after taking the tablets?
- IF YOU DID NOT TAKE ... → Why did you never take it?

**c) Experiences with ANC services and perceptions of service quality among pregnant women**

- What motivated you to come for antenatal consultation?
- Do you think you came early or late to this antenatal consultation?
- How many times did you come for antenatal consultation?
- What did the nurse do to you during this consultation?
- Do you remember about anything about malaria that you have told during the consultation?
  - If yes. → Can you tell what they told you?
- Did you receive any medication?
- How many tablets you received?
- Did the nurse explain to you the purpose of taking that medicines?
  - If no, Why you didn't consult?

Have you talked to the nurse during the consultation?

- What have you talked about with her?
- If No , Why you never talk to the nurse?
- In general, what is your opinion about the qualities of the services provided to you as pregnant women in the antenatal consultations in your health unit?
- Would you like to say something more about the ANC services in this health center?
