# Supplementary material for: Access to and use of preventive intermittent treatment for Malaria during pregnancy: A qualitative study in the Chókwè district, Southern Mozambique
Source: PubMed Central journal article supplement (PMC6345468; doi:10.1371/journal.pone.0203740), 2019-01-24
Supplement: pone.0203740.s002.pdf [file pone.0203740.s002.pdf]

## **S2 Form Interview guide with Nurses of Maternal Child Health**

### **Perceptions of pregnant women's attitudes towards IPTp-SP use among nurses**

- A1. On average how many pregnant women do you attend per day?
- a) In which gestational age the women normally appear for the first ANC consultation?
  - b) How many ANC visits they normally do?
- A2. Are there any criteria for administering antimalarial drug to prevent malaria in pregnant women?
- A3. At what gestational age do you recommend them start taking antimalarial drug to prevent malaria??
- A4. How frequent are malaria cases in pregnant women?
- A5. Which period you have seen the highest number of malaria tested women?
- a) Of those tested on a given day, how many of them have the positive diagnosis?
  - b) What procedures do follow when a woman has tested positive?
- A6. Are antimalarial drugs administered at the clinic or the women has to pick the up at the pharmacy?
- a) How long does the process of the consultation and antimalarial administration usually last?
- A7. Is there any explanation given to pregnant women during drug administration?
- If yes, what do they explain exactly?
  - If not, why not?
- A8. What do you think about pregnant women knowledge about importance of using antimalarial drugs during pregnancy?
- a) And how do you come to that perception?
  - b) Has any pregnant women ever refused to take this antimalarial drugs?
- If yes, what are the reasons?
- A9. In general, how many pregnant women receive the recommended dosage of IPTp?

### **Perceptions of challenges for IPTp-SP delivery among nurses**

- A10. What are the difficulties you are facing to get pregnant women comply with the recommended dosage of IPTp?
- Difficulties of the system;
  - Difficulties of the behavior of the providers; Difficulty of patient behavior.
- (Detail)
- A12. Have you ever had some antimalarial stockouts?
- A13. What is your perception about community perception about malaria prevention in this area
